# Supplementary material for: Sustainable Synthesis of p-Hydroxycinnamic Diacids through Proline-Mediated Knoevenagel Condensation in Ethanol: An Access to Potent Phenolic UV Filters and Radical Scavengers
Source: PubMed Central journal article supplement (PMC7222392; doi:10.3390/antiox9040331), 2020-04-18
Supplement: antioxidants-09-00331-s001.pdf [file antioxidants-09-00331-s001.pdf]

# Sustainable synthesis of *p*-hydroxycinnamic diacids through proline-mediated Knoevenagel condensation in ethanol: an access to potent phenolic UV filters and radical scavengers.

Benjamin RIOUX<sup>1</sup>, Cédric PEYROT<sup>1</sup>, Matthieu M. MENTION<sup>1</sup>, Fanny BRUNISSEN<sup>1</sup>, Florent ALLAIS\*<sup>1</sup>

<sup>1</sup> URD Agro-Biotechnologies Industrielles, CEBB, AgroParisTech, 51110, Pomacle, France.

\* Correspondence: [florent.allais@agroparistech.fr](mailto:florent.allais@agroparistech.fr); Tel: +33 (0) 3 52 62 04 62

Total number of Pages: 17 (Pages S1-S17)  
Total number of Figures: 18 (Figures S1-S18).  
Total number of Tables: 2 (Tables S1-S2).

## Table of contents

|                                                                                                                                                         |    |
|---------------------------------------------------------------------------------------------------------------------------------------------------------|----|
| General.....                                                                                                                                            | 3  |
| Figure S1. Structures and numeration of coumaric diacid (A), ferulic diacid (B), sinapic diacid (C) and caffeic diacid (D).....                         | 3  |
| Ferulic diacid .....                                                                                                                                    | 4  |
| Coumaric diacid.....                                                                                                                                    | 4  |
| Sinapic diacid.....                                                                                                                                     | 4  |
| Caffeic diacid.....                                                                                                                                     | 4  |
| Table S1. DOE experiments.....                                                                                                                          | 5  |
| Table S2. Application of the optimal conditions designed by the DOE to the <i>p</i> -hydroxybenzaldehydes. ....                                         | 6  |
| Table S3. PMI score calculation between our procedure (Entry 33, Table S1) and Peyrot <i>et al.</i> <sup>12</sup> conditions (Entry 34, Table S1). .... | 6  |
| Figure S2: UV spectra of diacids.....                                                                                                                   | 7  |
| Figure S3: Photostability of diacids. ....                                                                                                              | 8  |
| Figure S4: Photostability of Octinoxate.....                                                                                                            | 9  |
| Figure S5: Determination of the antiradical activity of diacids. ....                                                                                   | 10 |
| NMR analysis.....                                                                                                                                       | 11 |
| Figure S6: <sup>1</sup> H spectrum of aromatic zone for ferulic diacid conversion .....                                                                 | 11 |
| Figure S7: <sup>1</sup> H spectrum of ferulic diacid .....                                                                                              | 12 |
| Figure S8: <sup>13</sup> C spectrum of ferulic diacid .....                                                                                             | 12 |
| Figure S9: <sup>1</sup> H spectrum of coumaric diacid .....                                                                                             | 13 |
| Figure S10: <sup>13</sup> C spectrum of coumaric diacid .....                                                                                           | 13 |
| Figure S11: <sup>1</sup> H spectrum of sinapic diacid .....                                                                                             | 14 |

|                                                              |    |
|--------------------------------------------------------------|----|
| Figure S12: $^{13}\text{C}$ spectrum of sinapic diacid ..... | 14 |
| Figure S13: $^1\text{H}$ spectrum of caffeic diacid.....     | 15 |
| Figure S14: $^{13}\text{C}$ spectrum of caffeic diacid.....  | 15 |
| HRMS analysis .....                                          | 16 |
| Figure S15: HRMS spectrum of ferulic diacid .....            | 16 |
| Figure S16: HRMS spectrum of coumaric diacid .....           | 16 |
| Figure S17: HRMS spectrum of sinapic diacid .....            | 17 |
| Figure S18: HRMS spectrum of caffeic diacid.....             | 17 |

## General

All reagents were purchased from Sigma–Aldrich, TCI, Merck or VWR and used as received. Solvents were purchased from Thermo Fisher Scientific and VWR. Deuterated dimethylsulfoxide (DMSO-*d*6 <0.02% $\text{H}_2\text{O}$ ) was purchased from Euriso-top. Evaporations were conducted under reduced pressure at temperature below 40 °C. Column chromatography was carried out with an automated flash chromatography (PuriFlash 4100, Interchim) and pre-packed INTERCHIM PF-30C18HP-HP-F0080 (30  $\mu\text{m}$  silica gel) columns. UV/visible absorption spectra of diacids in ethanol were recorded using a UV/visible spectrometer Cary 60 Agilent Technologies at a concentration of 10  $\mu\text{M}$ . For the photostability study, samples (10  $\mu\text{M}$ , EtOH) were irradiated during one hour into a Rayonet<sup>®</sup> RPR-200 ( $\lambda = 300 \text{ nm}$ ,  $P = 8.32 \text{ W/m}^2$ , stirring,  $T = 35 \text{ }^\circ\text{C}$ ) using 14 RPR-3000A lamps (SNE Ultraviolet Co Branford Ct USA RPR-3000A). Then, UV spectra were recorded and the absorbance loss were calculated in percentage at the  $\lambda_{\text{max}}$ . NMR analyses were recorded on a Bruker Fourier 300.  $^1\text{H}$  NMR spectra of samples were recorded in DMSO (residual peak at  $\delta = 2.50 \text{ ppm}$ ) or  $(\text{CD}_3)_2\text{CO}$  (residual signal at  $\delta = 2.05 \text{ ppm}$ ) at 300 MHz, chemical shifts were reported in parts per million relatives to the solvent residual peak.  $^{13}\text{C}$  NMR spectra of samples were recorded at 75 MHz in DMSO (residual signal at  $\delta = 39.52 \text{ ppm}$ ) or  $(\text{CD}_3)_2\text{CO}$  (residual peak at  $\delta = 206.26$  and 29.84 ppm).  $^1\text{H}$  NMR crude calculation conversion was recorded by integration of diacids' aromatic signal. Melting points were recorded on a Metler Toledo MP50 Melting Points system,  $T_{\text{initial}} = 40 \text{ }^\circ\text{C}$ , heating 3 °C / minute until 200 °C with ME-18552 sample tubes. Mass spectrometry analysis were recorded on an Agilent Technologies 6545 Q-TOF LC/MS. The determination of the diacids' antiradical activities were determined *via* 2,2-diphenyl-1-picrylhydrazyl (DPPH) assay. These tests involve adding potential antiradical molecule solution in ethanol at different concentration to homogeneous DPPH solution. The amount needed to reduce the initial number of DPPH free radicals by half, i.e.  $\text{EC}_{50}$ , is provided by the crossing point of % DPPH (blue) and % reduced DPPH (green)

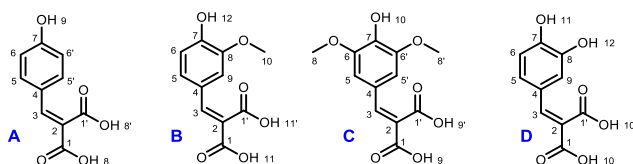

**Figure S1. Structures and numeration of coumaric diacid (A), ferulic diacid (B), sinapic diacid (C) and caffeic diacid (D).**

## Ferulic diacid

**Synthesis:** Vanillin (225 mg, 1.5 mmol), malonic acid (153.9 mg, 1.5 mmol, 1 eq), proline (17.1 mg, 0.15 mmol, 0.1 eq) and ethanol (3 mL, 0.5 M) were stirred at 60 °C for 4 hours. The reaction mixture was then evaporated under vacuum. Conversion yields were determined by proton NMR. Crude mixture was then purified by column chromatography on C-18 reverse silica gel using appropriate eluent system (H<sub>2</sub>O:methanol 80:20). 282 mg of a yellow/white powder was recovered (80%).

**<sup>1</sup>H NMR** (300 MHz, 25°C, (CD<sub>3</sub>)<sub>2</sub>CO): δ (ppm) = 7.62 (1H, s, H-3), 7.35 (1H, d, *J* = 2.0 Hz, H-9), 7.21 (1H, dd, *J* = 2.0 and 8.3 Hz, H-5), 6.89 (1H, d, *J* = 8.3 Hz, H-6), 3.86 (3H, s, H-10).

**<sup>13</sup>C NMR** (75 MHz, 25°C, (CD<sub>3</sub>)<sub>2</sub>CO): δ (ppm) = 168.5 and 165.9 (C-1 and C-1'), 150.1 (C-7), 148.3 (C-8), 142.1 (C-3), 125.7 (C-4), 125.5 (C-2), 124.4 (C-5), 116.0 (C-6), 113.6 (C-9), 56.1 (C-10).

**Melting point:** 190-192 ± 0.1 °C.

**TOF MS ES+:** [M+H]<sup>+</sup> for C<sub>11</sub>H<sub>11</sub>O<sub>6</sub>: *m/z* 239.0556; found: *m/z* 239.0555.

**UV:** λ max = 328 nm.

**DPPH:** EC<sub>50</sub> = 20.72 nmol.

## Coumaric diacid

**Synthesis:** 4-hydroxybenzaldehyde (181.4 mg, 1.5 mmol), malonic acid (153.9 mg, 1.5 mmol, 1 eq), proline (17.1 mg, 0.15 mmol, 0.1 eq) and ethanol (3 mL, 0.5 M) were stirred at 60 °C for 4 hours. The reaction mixture was then evaporated under vacuum. Conversion yields were determined by proton NMR. Crude mixture was then purified by column chromatography on C-18 reverse silica gel using appropriate eluent system (H<sub>2</sub>O:methanol 80:20). 219.3 mg of a yellow/white powder was recovered (71%).

**<sup>1</sup>H NMR** (300 MHz, 25°C, (CD<sub>3</sub>)<sub>2</sub>CO): δ (ppm) = 7.62 (1H, s, H-3), 7.58 (2H, d, *J* = 8.6 Hz, H-5 and H-5'), 6.91 (2H, d, *J* = 8.7 Hz, H-6 and H-6').

**<sup>13</sup>C NMR** (75 MHz, 25°C, (CD<sub>3</sub>)<sub>2</sub>CO): δ (ppm) = 168.5 and 165.9 (C-1 and C-1'), 160.8 (C-7), 141.7 (C-3), 132.9 (C-5 and C-5'), 125.4 (C-4), 124.4 (C-2), 116.7 (C-6 and C-6').

**Melting point:** 183-186 ± 0.1 °C.

**TOF MS ES+:** [M+H]<sup>+</sup> for C<sub>10</sub>H<sub>9</sub>O<sub>5</sub>: *m/z* 209.0450; found: *m/z* 209.0450.

**UV:** λ max = 314 nm.

**DPPH:** EC<sub>50</sub> = no EC<sub>50</sub> was obtained at studied concentrations.

## Sinapic diacid

**Synthesis:** Syringaldehyde (270.5 mg, 1.5 mmol), malonic acid (153.9 mg, 1.5 mmol, 1 eq), proline (17.1 mg, 0.15 mmol, 0.1 eq) and ethanol (3 mL, 0.5 M) were stirred at 60 °C for 4 hours. The reaction mixture was then evaporated under vacuum. Conversion yields were determined by proton NMR. Crude mixture was then purified by column chromatography on C-18 reverse silica gel using appropriate eluent system (H<sub>2</sub>O:methanol 80:20 to 50:50). 269.5 mg of a yellow/white powder was recovered (68%).

**<sup>1</sup>H NMR** (300 MHz, 25°C, (CD<sub>3</sub>)<sub>2</sub>CO): δ (ppm) = 7.99 (1H, s, H-10), 7.61 (1H, s, H-3), 7.06 (2H, s, H-5 and H-5'), 3.84 (6H, s, H-8 and H-8').

**<sup>13</sup>C NMR** (75 MHz, 25°C, (CD<sub>3</sub>)<sub>2</sub>CO): δ (ppm) = 168.9 and 165.8 (C-1 and C-1'), 148.8 (C-6 and C-6'), 142.3 (C-3), 139.8 (C-7), 124.9 (C-4), 124.5 (C-2), 108.7 (C-5 and C-5'), 56.1 (C-8 and C-8').

**Melting point:** 172-175 ± 0.1 °C.

**TOF MS ES+:** [M+H]<sup>+</sup> for C<sub>12</sub>H<sub>13</sub>O<sub>7</sub>: *m/z* 269.0661; found: *m/z* 269.0661.

**UV:** λ max = 330 nm.

**DPPH:** EC<sub>50</sub> = 3.86 nmol.

## Caffeic diacid

**Synthesis:** 3,4-dihydroxybenzaldehyde (270.5 mg, 1.5 mmol), malonic acid (153.9 mg, 1.5 mmol, 1 eq), proline (17.1 mg, 0.15 mmol, 0.1 eq) and ethanol (3 mL, 0.5 M) were stirred at 60 °C for 4 hours. The reaction mixture was then evaporated under vacuum. Conversion yields were determined by proton NMR. Crude mixture was then purified by column chromatography on C-18 reverse silica gel using appropriate eluent system (H<sub>2</sub>O:methanol 90:10). 197.7 mg of a yellow/white powder was recovered (60%).

**<sup>1</sup>H NMR** (300 MHz, 25°C, (CD<sub>3</sub>)<sub>2</sub>CO): δ (ppm) = 7.54 (1H, s, H-3), 7.24 (1H, d, *J* = 2.2 Hz, H-9), 7.08 (1H, dd, *J* = 2.2 and 8.3 Hz, H-5), 6.89 (1H, d, *J* = 8.3 Hz, H-6).

**<sup>13</sup>C NMR** (75 MHz, 25°C, (CD<sub>3</sub>)<sub>2</sub>CO): δ (ppm) = 168.4 and 165.9 (C-1 and C-1'), 149.0 (C-7), 146.1 (C-8), 141.8 (C-3), 125.9 (C-4), 124.7 (C-2), 124.4 (C-5), 116.9 (C-9), 116.3 (C-6).

**Melting point:** 162-164 ± 0.1 °C.

**TOF MS ES+:** [M+H]<sup>+</sup> for C<sub>10</sub>H<sub>9</sub>O<sub>6</sub>: *m/z* 225.0399; found: *m/z* 225.0399.

**UV:** λ max = 340 nm.

**DPPH:** EC<sub>50</sub> = 2.96 nmol.

| N°                | Eq Proline | Eq Malonic Acid | Temperature (°C) | Time (h) | m Proline (mg) | m Malonic Acid (mg) | m Vanillin (mg) | V Ethanol (mL) | Vanillin (%) <sup>[a]</sup> | Diacid (%) <sup>[a]</sup> | Acid (%) <sup>[a]</sup> | Other (%) <sup>[a]</sup> | Total (%) |
|-------------------|------------|-----------------|------------------|----------|----------------|---------------------|-----------------|----------------|-----------------------------|---------------------------|-------------------------|--------------------------|-----------|
| 1                 | 0.1        | 1               | 20               | 4        | 5.7            | 51.3                | 75              | 1              | 59                          | 34                        | 2                       | 5                        | 100       |
| 2                 | 0.1        | 4               | 20               | 4        | 5.7            | 205.2               | 75              | 1              | 55                          | 40                        | 3                       | 2                        | 100       |
| 3                 | 1          | 4               | 20               | 4        | 56.8           | 205.2               | 75              | 1              | 6                           | 83                        | 3                       | 8                        | 100       |
| 4                 | 0.1        | 1               | 60               | 4        | 5.7            | 51.3                | 75              | 1              | 19                          | 78                        | 1                       | 2                        | 100       |
| 5                 | 0.1        | 4               | 60               | 4        | 5.7            | 205.2               | 75              | 1              | 20                          | 71                        | 1                       | 9                        | 100       |
| 6                 | 1          | 1               | 33.3             | 4        | 56.8           | 5103                | 75              | 1              | 11                          | 78                        | 2                       | 10                       | 100       |
| 7                 | 1          | 2               | 60               | 4        | 56.8           | 102.6               | 75              | 1              | 5                           | 63                        | 13                      | 18                       | 100       |
| 8                 | 0.7        | 4               | 60               | 4        | 39.7           | 205.2               | 75              | 1              | 4                           | 90                        | 3                       | 2                        | 100       |
| 9                 | 0.6        | 1               | 40               | 4        | 31.2           | 51.3                | 75              | 1              | 16                          | 66                        | 6                       | 12                       | 100       |
| 10                | 1          | 1               | 20               | 8        | 56.8           | 51.3                | 75              | 1              | 11                          | 61                        | 14                      | 14                       | 100       |
| 11                | 1          | 4               | 46.7             | 8        | 56.8           | 205.2               | 75              | 1              | 3                           | 75                        | 12                      | 10                       | 100       |
| 12                | 0.7        | 1               | 60               | 8        | 39.7           | 51.3                | 75              | 1              | 13                          | 57                        | 19                      | 12                       | 100       |
| 13                | 0.4        | 4               | 20               | 8        | 22.7           | 205.2               | 75              | 1              | 6                           | 82                        | 0                       | 11                       | 100       |
| 14                | 0.1        | 2.5             | 40               | 8        | 5.7            | 128.2               | 75              | 1              | 11                          | 79                        | 0                       | 10                       | 100       |
| 15                | 0.1        | 1               | 20               | 16       | 5.7            | 51.3                | 75              | 1              | 39                          | 39                        | 5                       | 17                       | 100       |
| 16                | 0.1        | 4               | 20               | 16       | 5.7            | 205.2               | 75              | 1              | 53                          | 40                        | 2                       | 5                        | 100       |
| 17                | 0.1        | 1               | 60               | 16       | 5.7            | 51.3                | 75              | 1              | 28                          | 60                        | 2                       | 9                        | 100       |
| 18                | 1          | 1               | 60               | 16       | 56.8           | 51.3                | 75              | 1              | 15                          | 30                        | 38                      | 17                       | 100       |
| 19                | 0.1        | 4               | 60               | 16       | 5.7            | 205.2               | 75              | 1              | 17                          | 68                        | 4                       | 11                       | 100       |
| 20                | 1          | 4               | 60               | 16       | 56.8           | 205.2               | 75              | 1              | 11                          | 20                        | 25                      | 45                       | 100       |
| 21                | 1          | 4               | 33.3             | 16       | 56.8           | 205.2               | 75              | 1              | 2                           | 89                        | 2                       | 7                        | 100       |
| 22                | 1          | 2               | 20               | 16       | 56.8           | 102.6               | 75              | 1              | 4                           | 80                        | 2                       | 14                       | 100       |
| 23                | 1          | 3               | 20               | 16       | 56.8           | 153.9               | 75              | 1              | 4                           | 81                        | 3                       | 13                       | 100       |
| 24                | 0.6        | 1               | 40               | 16       | 31.2           | 51.3                | 75              | 1              | 19                          | 60                        | 4                       | 17                       | 100       |
| 25                | 0.6        | 2.5             | 60               | 16       | 31.2           | 128.2               | 75              | 1              | 10                          | 41                        | 17                      | 32                       | 100       |
| 26                | 0.6        | 2.5             | 40               | 8        | 31.2           | 128.2               | 75              | 1              | 1                           | 91                        | 3                       | 5                        | 100       |
| 27                | 0.6        | 2.5             | 40               | 8        | 31.2           | 128.2               | 75              | 1              | 2                           | 83                        | 3                       | 11                       | 100       |
| 28                | 0.6        | 2.5             | 40               | 8        | 31.2           | 128.2               | 75              | 1              | 2                           | 83                        | 4                       | 11                       | 100       |
| 29                | 0.1        | 1               | 60               | 4        | 5.7            | 51.3                | 75              | 1              | 15                          | 77                        | 1                       | 7                        | 100       |
| 30                | 0.1        | 1               | 60               | 5        | 5.7            | 51.3                | 75              | 1              | 20                          | 73                        | 1                       | 6                        | 100       |
| 31                | 0.1        | 1               | 60               | 6        | 5.7            | 51.3                | 75              | 1              | 18                          | 72                        | 1                       | 9                        | 100       |
| 32                | 0.1        | 1               | 60               | 4        | 17.1           | 153.9               | 225             | 3              | 19                          | 75                        | 1                       | 4                        | 100       |
| 33                | 0.1        | 1               | 60               | 4        | 17.1           | 153.9               | 225             | 3              | 17                          | 80                        | 1                       | 2                        | 100       |
| 34 <sup>[b]</sup> | 1.1        | 3               | 40               | 16       | 187.3          | 461.7               | 225             | 3              | 25                          | 68                        | 7                       | 0                        | 100       |
| 35                | 0.1        | 1               | 60               | 2        | 17.1           | 153.9               | 225             | 3              | 41                          | 55                        | 3                       | 1                        | 100       |
| 36                | 0.1        | 1               | 60               | 3        | 17.1           | 153.9               | 225             | 3              | 36                          | 60                        | 3                       | 1                        | 100       |

[a] percentage of conversions were determined from the <sup>1</sup>H NMR spectrum of the crude reaction mixture

[b]: according to Peyrot *et al.*<sup>12</sup>

Table S1. DOE experiments.

| Benzaldehyde | Eq Proline | Eq Malonic | Temperature (°C) | Time (h) | m Proline (mg) | m Malonic Acid (mg) | m Aldehyde (mg) | V Ethanol (mL) | Aldehyde (%) [a] | Diacid (%) [a] | Acid (%) [a] | Other (%) [a] | Total (%) | Isolated Yield (%) |
|--------------|------------|------------|------------------|----------|----------------|---------------------|-----------------|----------------|------------------|----------------|--------------|---------------|-----------|--------------------|
| Vanilline    | 0.1        | 1          | 60               | 4        | 17.1           | 153.9               | 225.0           | 3              | 17               | 80             | 1            | 2             | 100       | 80                 |
| 4-OH         | 0.1        | 1          | 60               | 4        | 17.1           | 153.9               | 181.4           | 3              | 25               | 71             | 3            | 1             | 100       | 71                 |
| 3,4-diOH     | 0.1        | 1          | 60               | 4        | 17.1           | 153.9               | 205.1           | 3              | 30               | 61             | 3            | 6             | 100       | 60                 |
| Syngaldehyde | 0.1        | 1          | 60               | 4        | 17.1           | 153.9               | 270.5           | 3              | 16               | 70             | 12           | 2             | 100       | 68                 |

[a] percentage of conversions were determined from the <sup>1</sup>H NMR spectrum of the crude reaction mixture

**Table S2. Application of the optimal conditions designed by the DOE to the *p*-hydroxybenzaldehydes.**

| Entry 33                                               |                          |            |                          |        |
|--------------------------------------------------------|--------------------------|------------|--------------------------|--------|
|                                                        | n (mol)                  | Yields (%) | M (g.mol <sup>-1</sup> ) | m (g)  |
| Ferulic diacid                                         | 1.00E-02                 | 80.06      | 238.195                  | 2.382  |
| reactants                                              |                          |            |                          |        |
|                                                        | eq                       | n (mol)    | M (g.mol <sup>-1</sup> ) | m (g)  |
| Vanilin                                                | 1                        | 1.249E-02  | 152.149                  | 1.900  |
| Proline                                                | 0.1                      | 1.249E-03  | 115.1305                 | 0.144  |
| Malonic acid                                           | 1                        | 1.249E-02  | 104.0615                 | 1.300  |
| Ethanol                                                |                          |            |                          |        |
|                                                        | C (mol.L <sup>-1</sup> ) | v (mL)     | ρ (g.mL <sup>-1</sup> )  | m (g)  |
|                                                        | 0.5                      | 25         | 0.789                    | 19.711 |
| m reactants (g)    m ferulic diacid (g)    PMI score   |                          |            |                          |        |
| 23.055                    2.382                    9.7 |                          |            |                          |        |
| Without ethanol:                                       |                          |            |                          |        |
| m reactants (g)    m ferulic diacid (g)    PMI score   |                          |            |                          |        |
| 3.344                    2.382                    1.4  |                          |            |                          |        |

| Entry 34 (Peyrot <i>et al.</i> <sup>12</sup> )          |                          |            |                          |        |
|---------------------------------------------------------|--------------------------|------------|--------------------------|--------|
|                                                         | n (mol)                  | Yields (%) | M (g.mol <sup>-1</sup> ) | m (g)  |
| Ferulic diacid                                          | 1.00E-02                 | 67.99      | 238.195                  | 2.382  |
| reactants                                               |                          |            |                          |        |
|                                                         | eq                       | n (mol)    | M (g.mol <sup>-1</sup> ) | m (g)  |
| Vanilin                                                 | 1                        | 1.471E-02  | 152.149                  | 2.238  |
| Proline                                                 | 1.1                      | 1.618E-02  | 115.1305                 | 1.863  |
| Malonic acid                                            | 3                        | 4.412E-02  | 104.0615                 | 4.591  |
| Ethanol                                                 |                          |            |                          |        |
|                                                         | C (mol.L <sup>-1</sup> ) | v (mL)     | ρ (g.mL <sup>-1</sup> )  | m (g)  |
|                                                         | 0.5                      | 29         | 0.789                    | 23.209 |
| m reactants (g)    m ferulic diacid (g)    PMI score    |                          |            |                          |        |
| 31.900                    2.382                    13.4 |                          |            |                          |        |
| Without ethanol:                                        |                          |            |                          |        |
| m reactants (g)    m ferulic diacid (g)    PMI score    |                          |            |                          |        |
| 8.692                    2.382                    3.6   |                          |            |                          |        |

**Table S3. PMI score calculation between our procedure (Entry 33, Table S1) and Peyrot *et al.*<sup>12</sup> conditions (Entry 34, Table S1).**

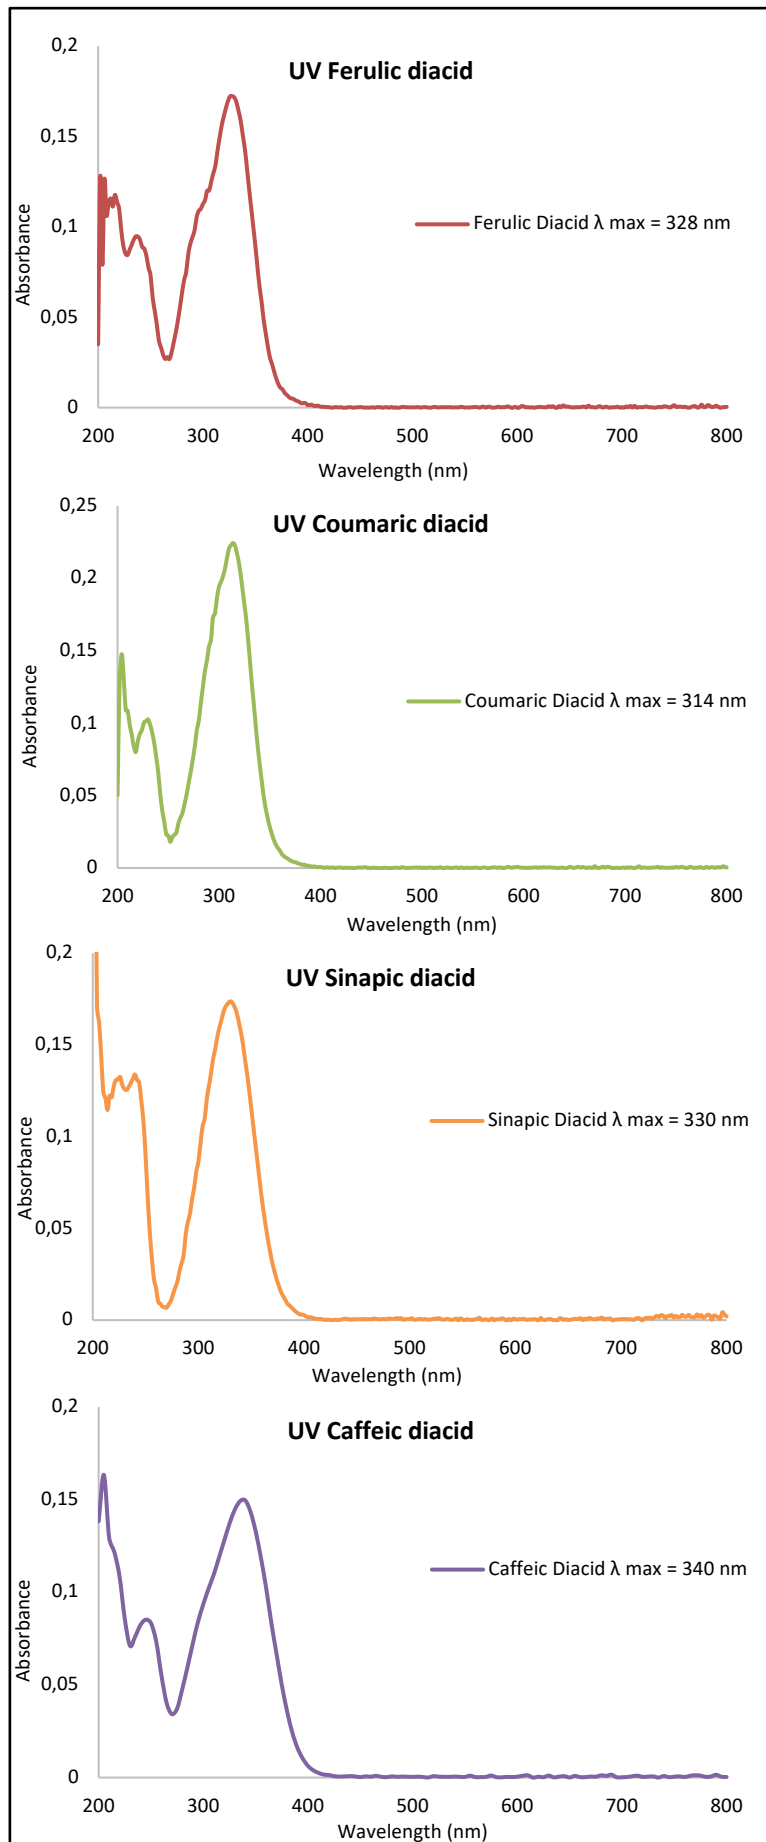

Figure S2: UV spectra of diacids.

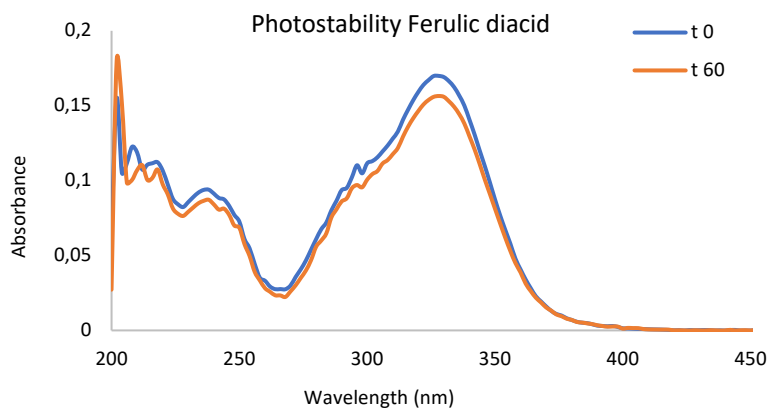

|                     | t 0   | t 60  |
|---------------------|-------|-------|
| $\lambda$ max (nm)  | 328   | 328   |
| A max               | 0.170 | 0.156 |
| Absorbance loss (%) |       | 7.9   |

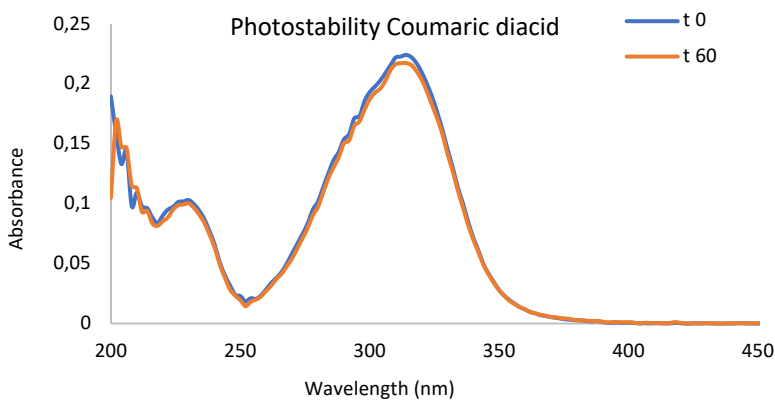

|                     | t 0   | t 60  |
|---------------------|-------|-------|
| $\lambda$ max (nm)  | 314   | 314   |
| A max               | 0.224 | 0.217 |
| Absorbance loss (%) |       | 3.0   |

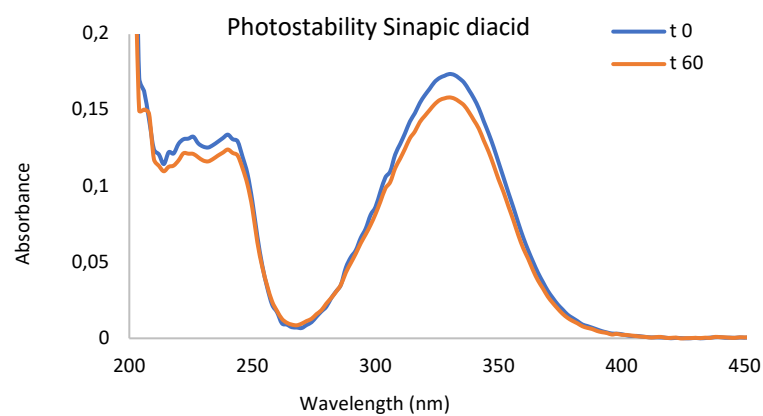

|                     | t 0   | t 60  |
|---------------------|-------|-------|
| $\lambda$ max (nm)  | 330   | 330   |
| A max               | 0.174 | 0.158 |
| Absorbance loss (%) |       | 8.9   |

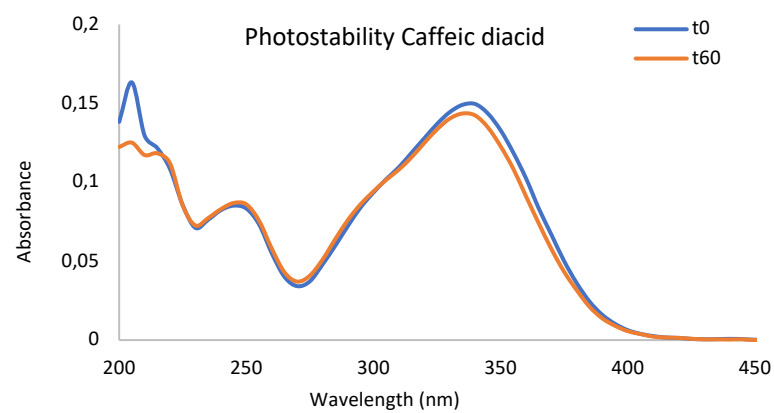

|                     | t 0   | t 60  |
|---------------------|-------|-------|
| $\lambda$ max (nm)  | 340   | 340   |
| A max               | 0.150 | 0.142 |
| Absorbance loss (%) |       | 4.9   |

Figure S3: Photostability of diacids.



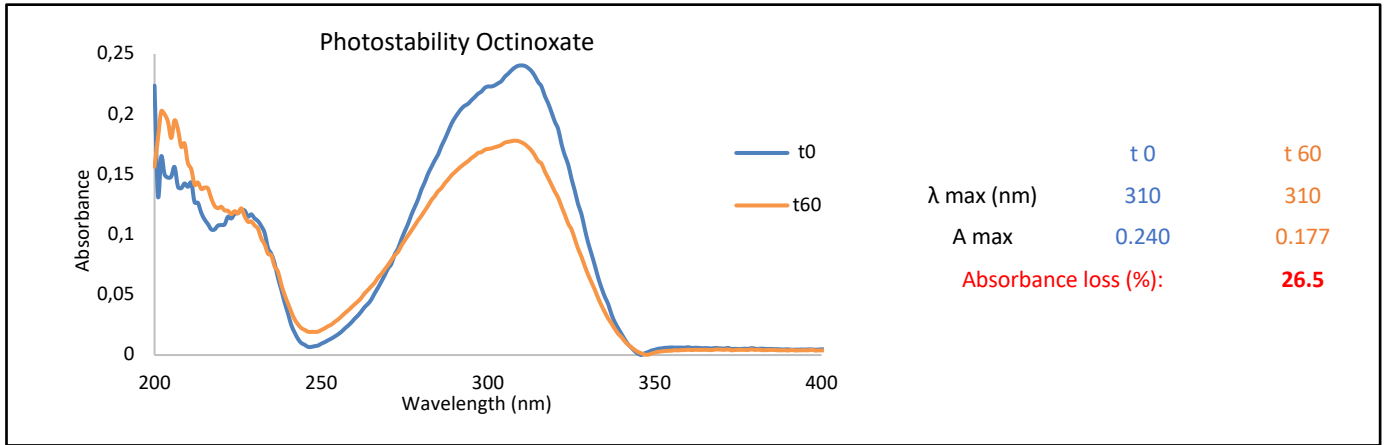

Figure S4: Photostability of Octinoxate.

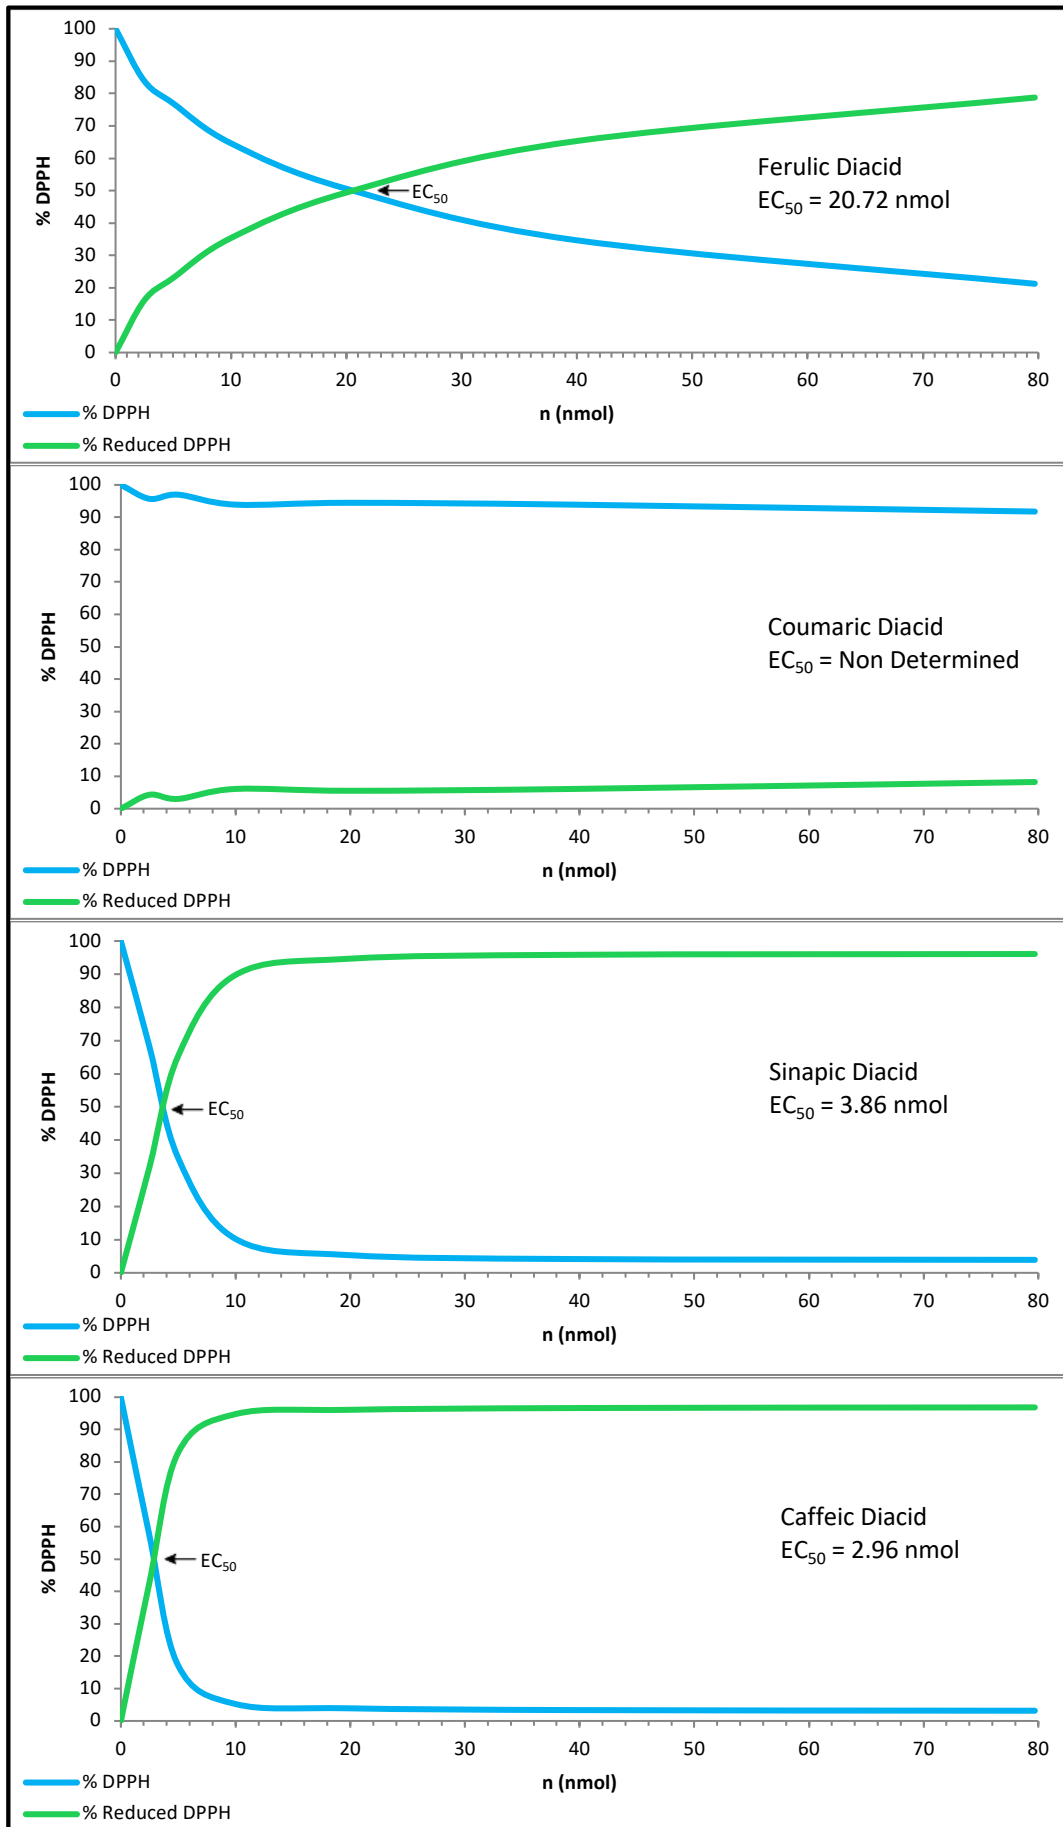

Figure S5: Determination of the antiradical activity of diacids.

## NMR analysis

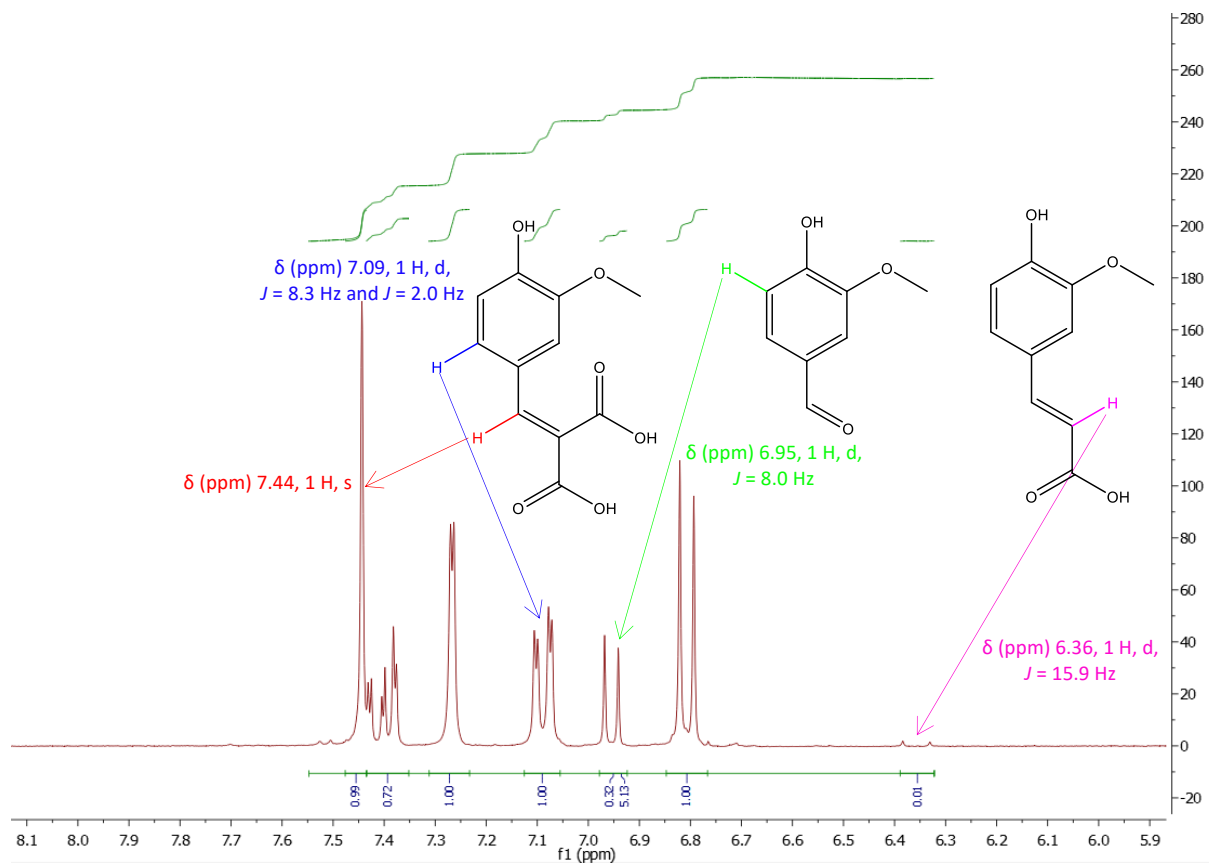

Figure S6:  $^1\text{H}$  spectrum of aromatic zone for ferulic diacid conversion

Total diacid aromatic protons: vanillin 3, diacid 4, monoacid 5.

Total spectra aromatic protons = 5.13

Vanillin still presents:  $(0.32 \times 3) / 5.13 = 19\%$

Ferulic diacid conversion:  $(1 \times 4) / 5.13 = 78\%$

Ferulic acid conversion:  $(0.01 \times 5) / 5.13 = 1\%$

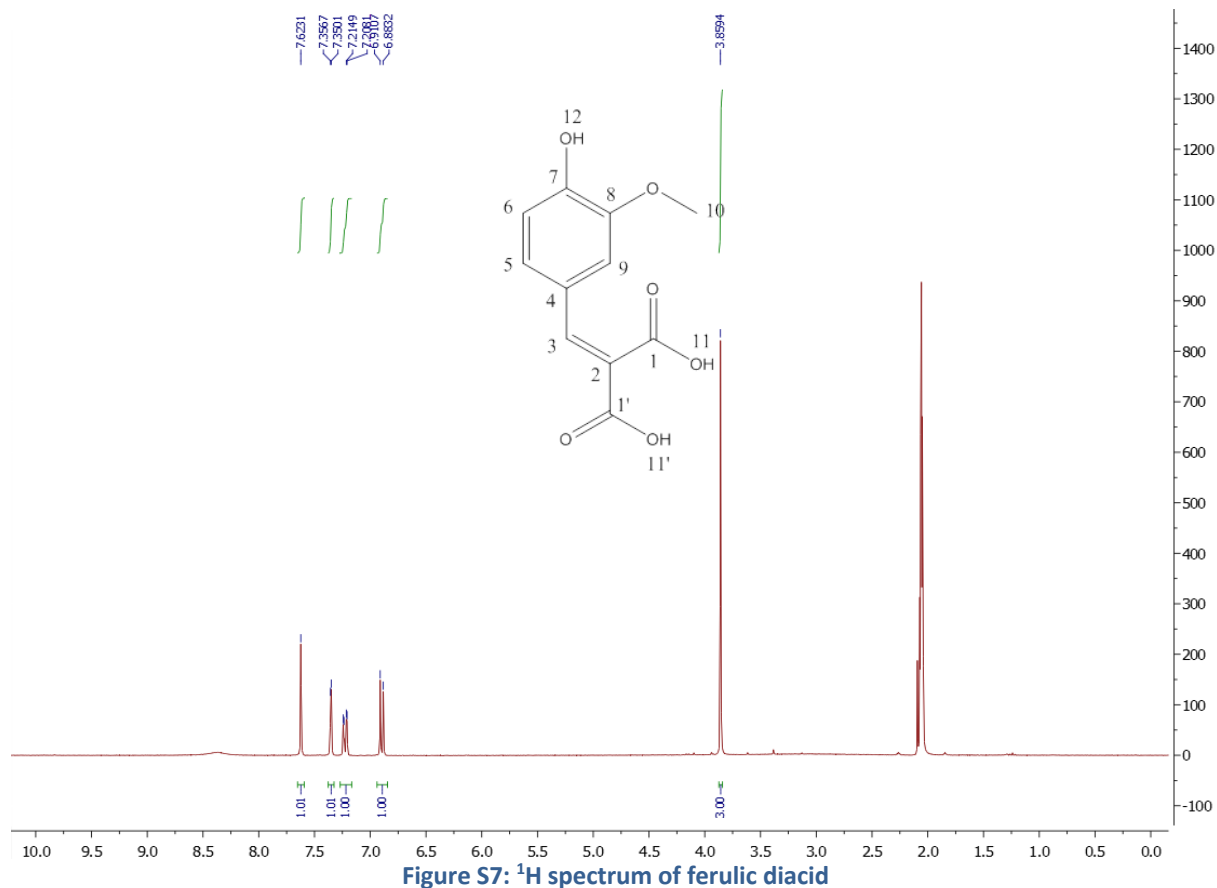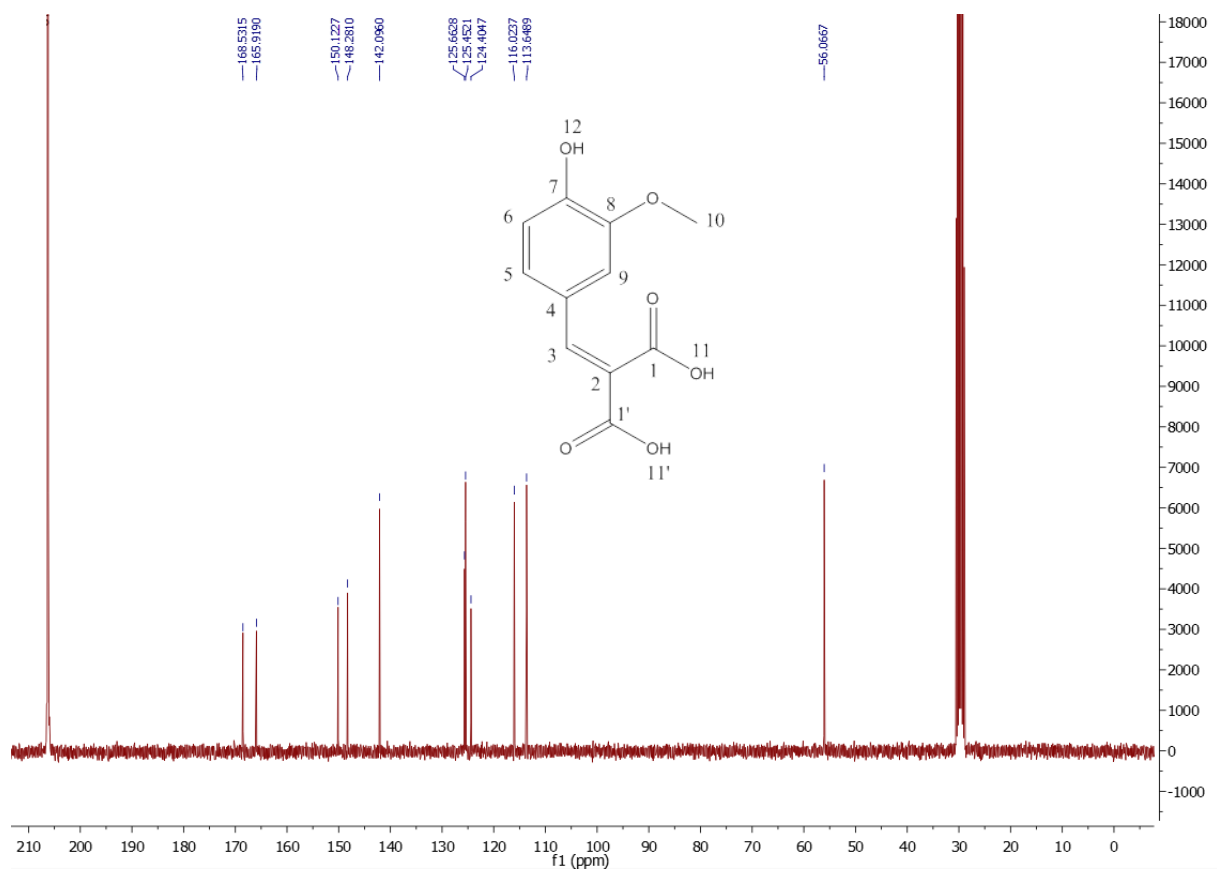

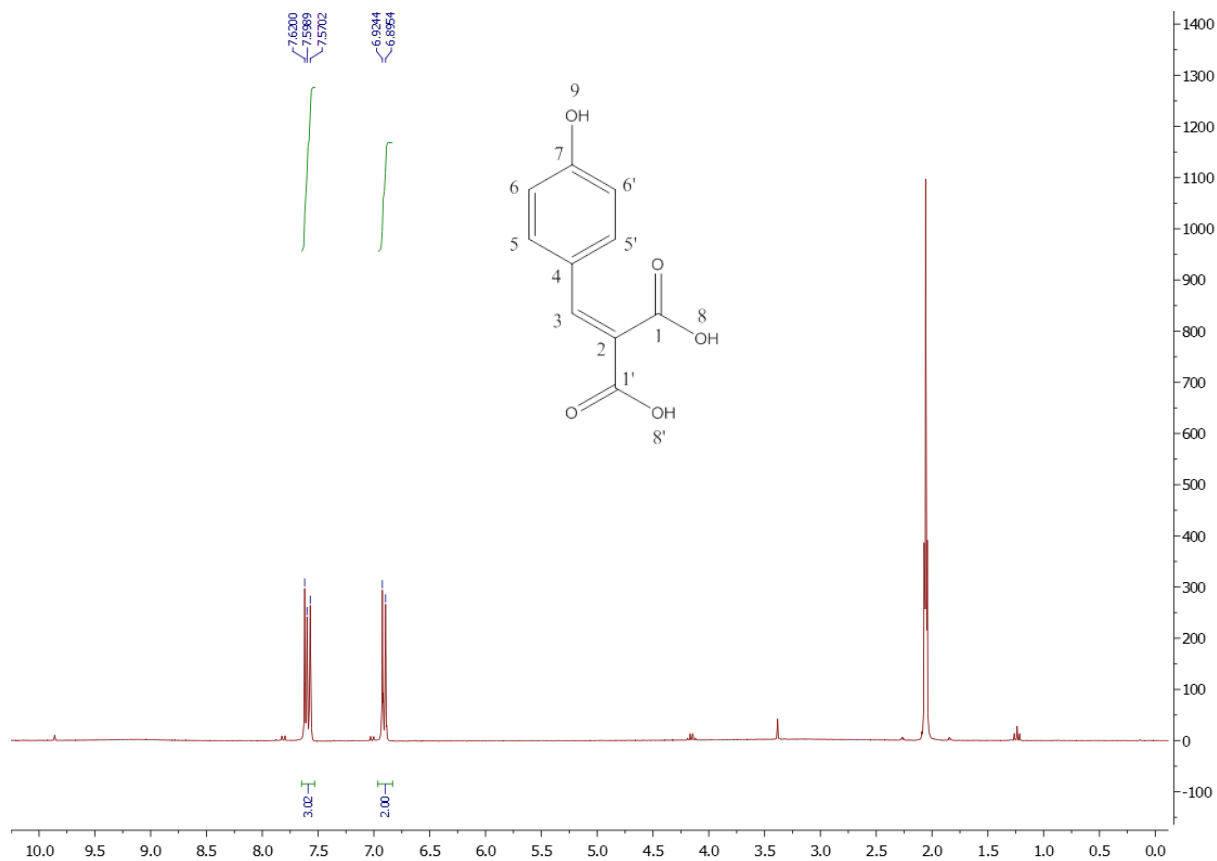

Figure S9:  $^1\text{H}$  spectrum of coumaric diacid

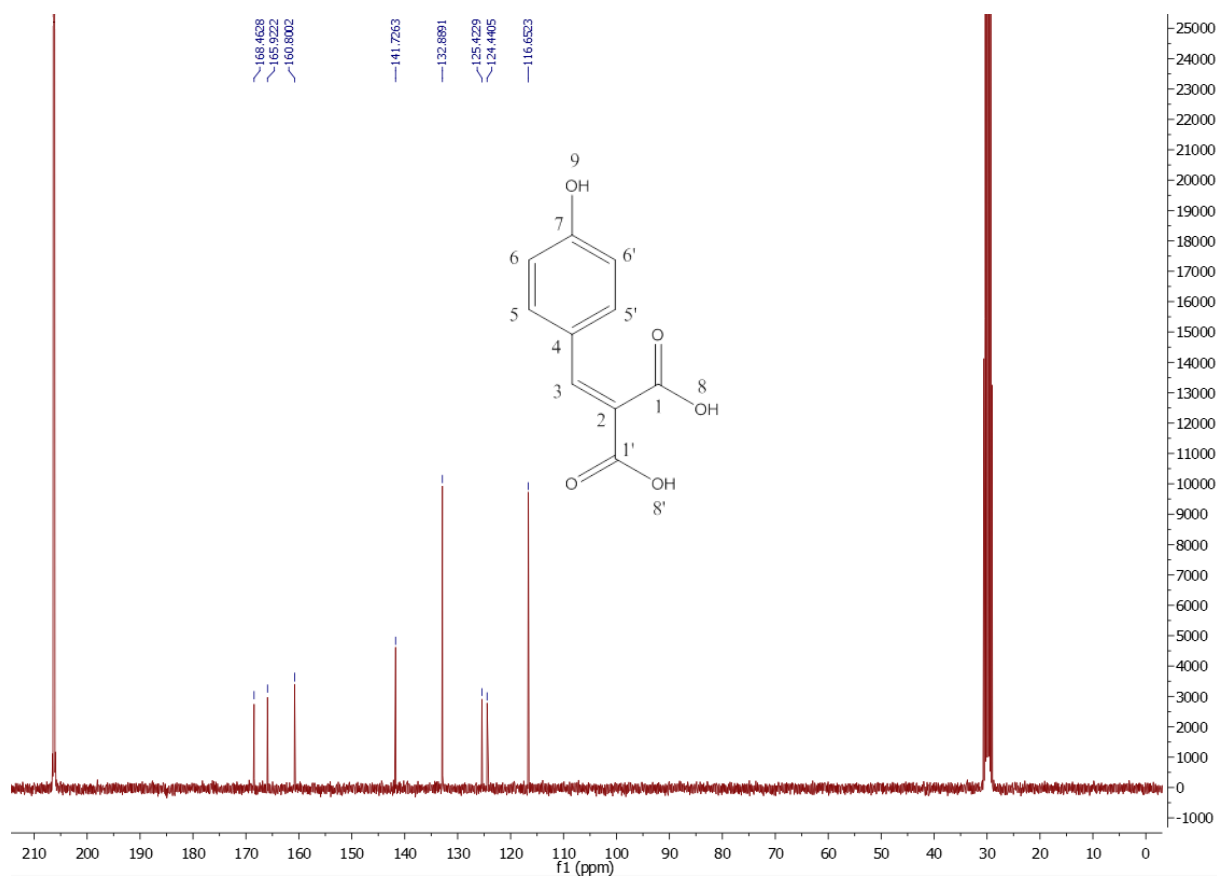

Figure S10:  $^{13}\text{C}$  spectrum of coumaric diacid

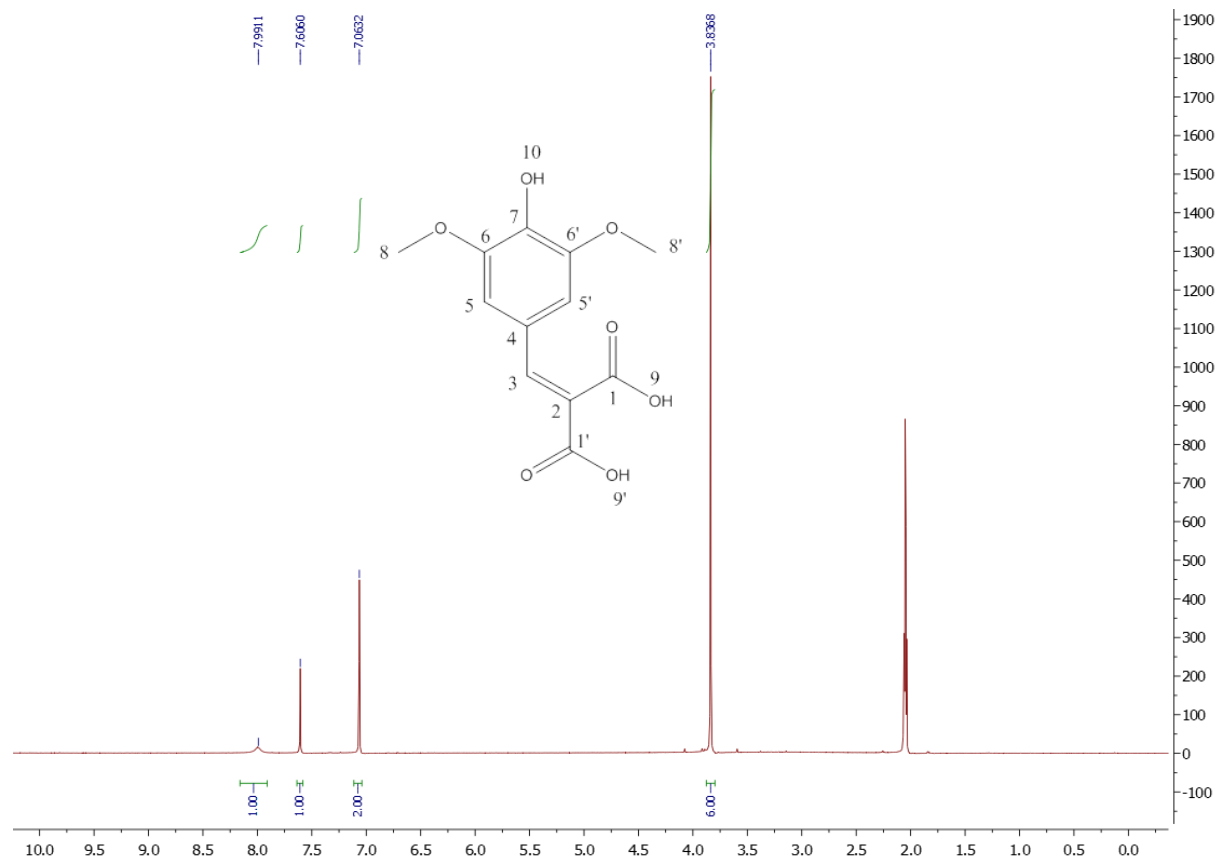

Figure S11:  $^1\text{H}$  spectrum of sinapic diacid

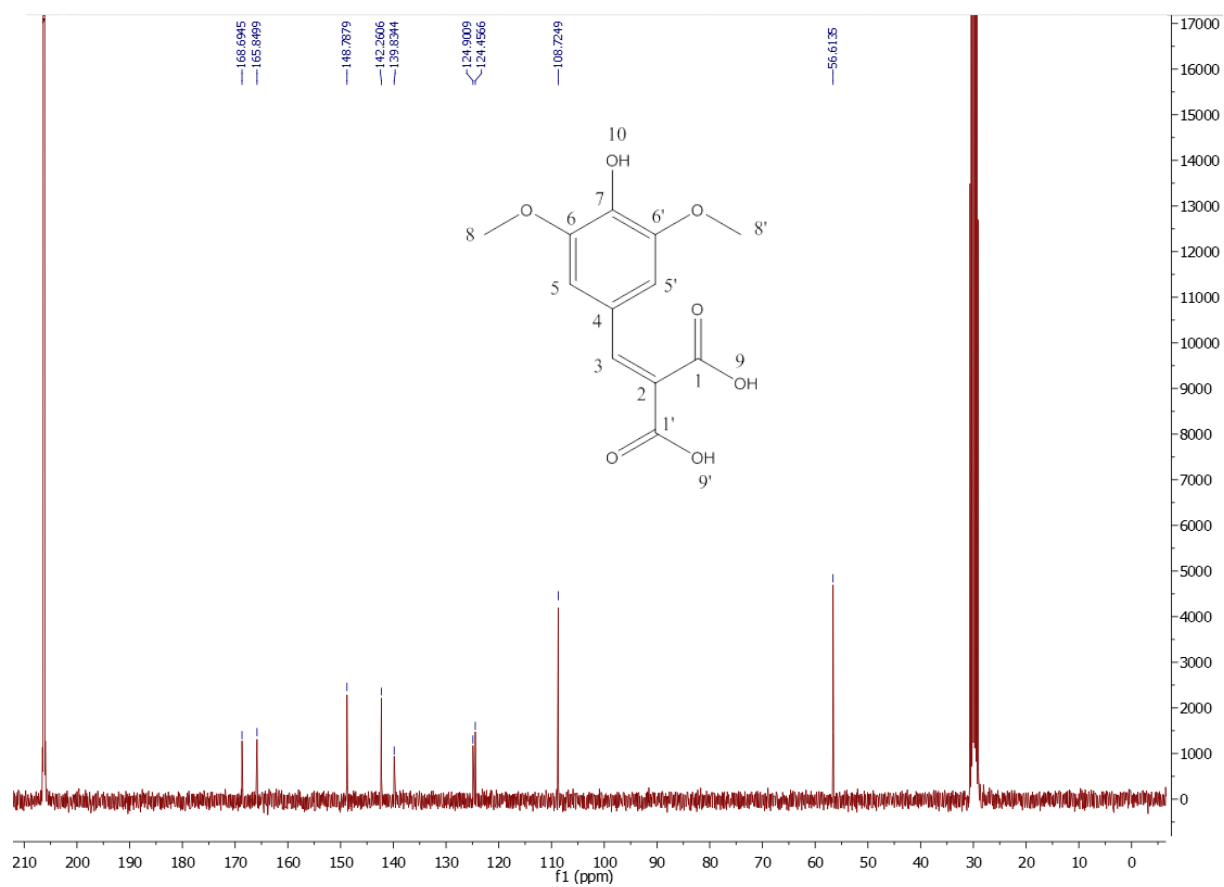

Figure S12:  $^{13}\text{C}$  spectrum of sinapic diacid

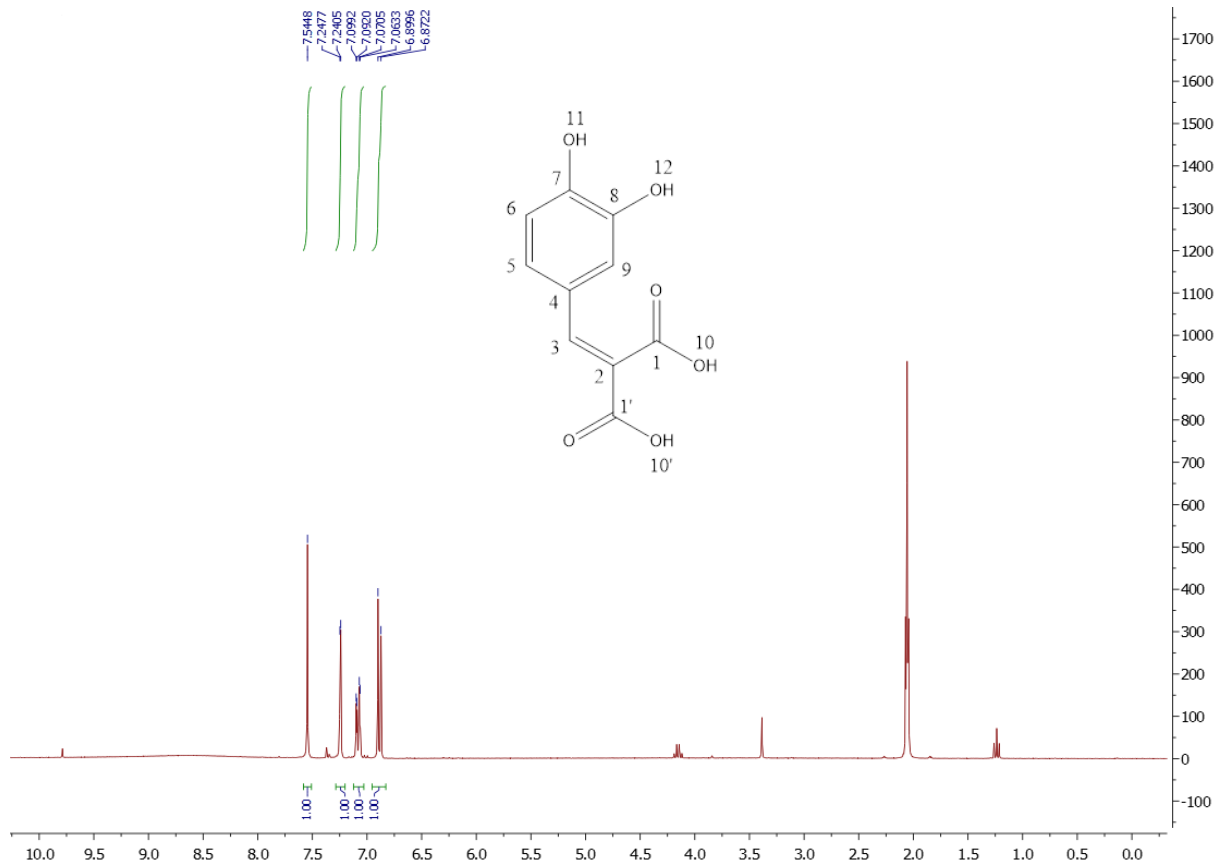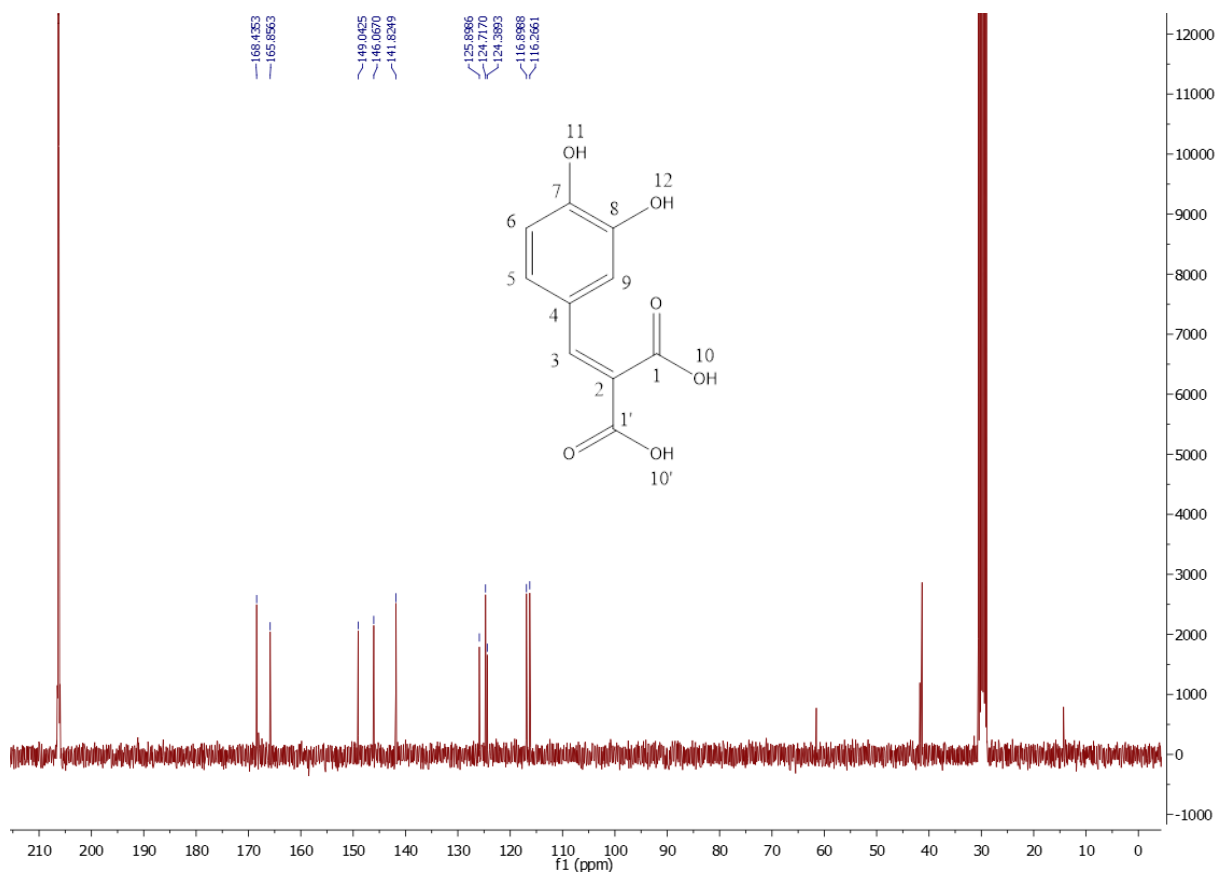

## HRMS analysis

|             |                                          |                        |         |                 |                                  |
|-------------|------------------------------------------|------------------------|---------|-----------------|----------------------------------|
| Sample Name | RB-ferulic diacid                        | Position               | P1-E1   | Instrument Name | QTOF                             |
| User Name   |                                          | Inj Vol                | 1       | InjPosition     |                                  |
| Sample Type | Sample                                   | IRM Calibration Status | Success | Data Filename   | RB-ferulic diacid.d              |
| ACQ Method  | ZorbaxC18-2019-12-04-H2Oac-ACN-avec-ref. | Comment                |         | Acquired Time   | 12/5/2019 4:26:09 PM (UTC+01:00) |

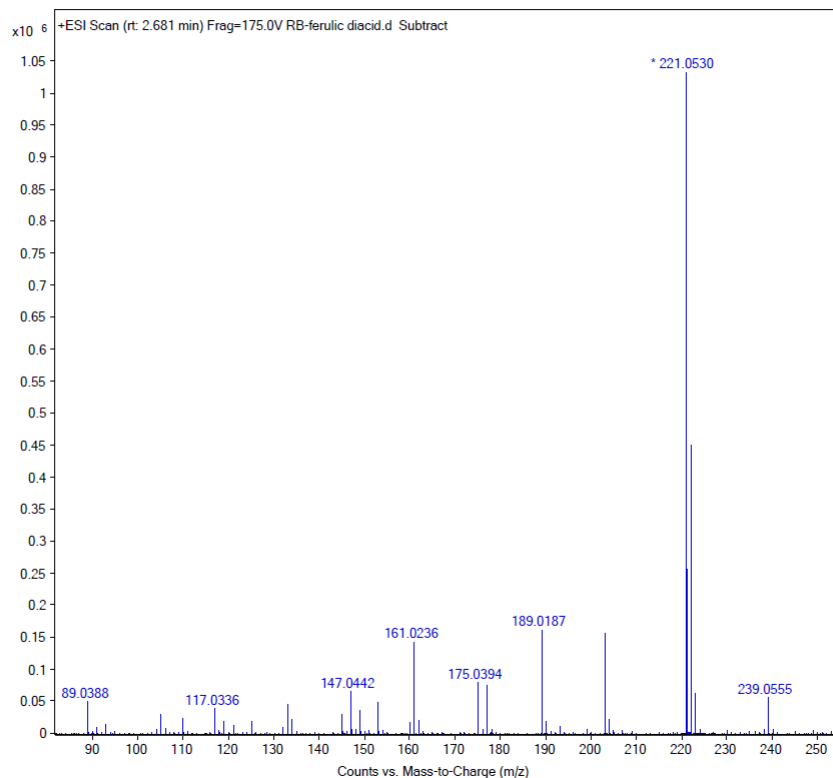

Figure S15: HRMS spectrum of ferulic diacid

|             |                                          |                        |         |                 |                                  |
|-------------|------------------------------------------|------------------------|---------|-----------------|----------------------------------|
| Sample Name | RB-coumaric diacid                       | Position               | P1-E2   | Instrument Name | QTOF                             |
| User Name   |                                          | Inj Vol                | 1       | InjPosition     |                                  |
| Sample Type | Sample                                   | IRM Calibration Status | Success | Data Filename   | RB-coumaric diacid.d             |
| ACQ Method  | ZorbaxC18-2019-12-04-H2Oac-ACN-avec-ref. | Comment                |         | Acquired Time   | 12/5/2019 4:48:14 PM (UTC+01:00) |

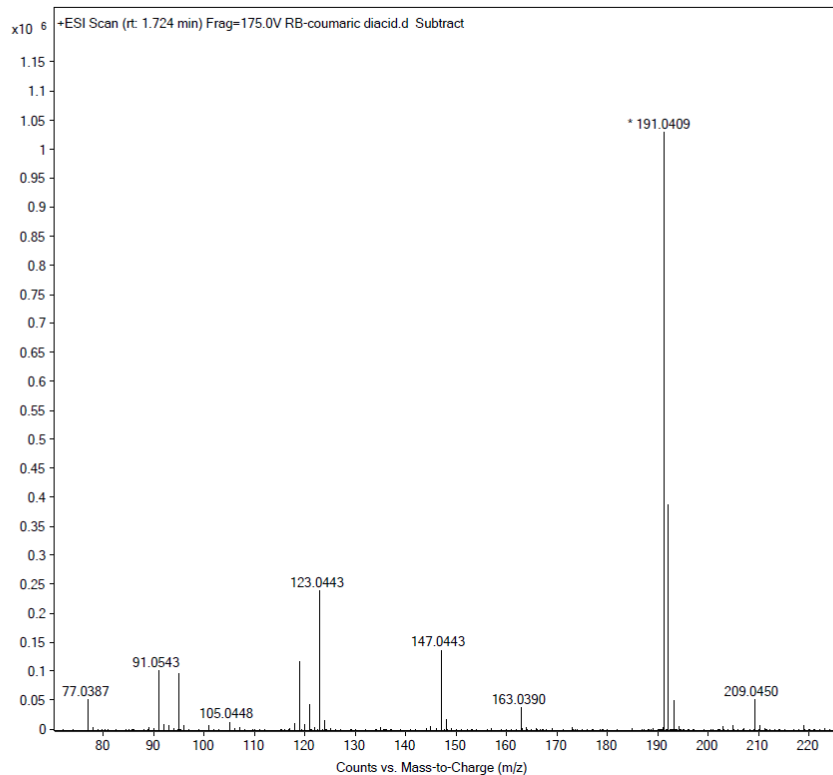

Figure S16: HRMS spectrum of coumaric diacid



|                    |                                          |                               |         |                        |                                  |
|--------------------|------------------------------------------|-------------------------------|---------|------------------------|----------------------------------|
| <b>Sample Name</b> | RB-sinapic diacid                        | <b>Position</b>               | P1-E3   | <b>Instrument Name</b> | QTOF                             |
| <b>User Name</b>   |                                          | <b>Inj Vol</b>                | 1       | <b>InjPosition</b>     |                                  |
| <b>Sample Type</b> | Sample                                   | <b>IRM Calibration Status</b> | Success | <b>Data Filename</b>   | RB-sinapic diacid.d              |
| <b>ACQ Method</b>  | ZorbaxC18-2019-12-04-H2Oac-ACN-avec-ref. | <b>Comment</b>                |         | <b>Acquired Time</b>   | 12/5/2019 5:10:17 PM (UTC+01:00) |

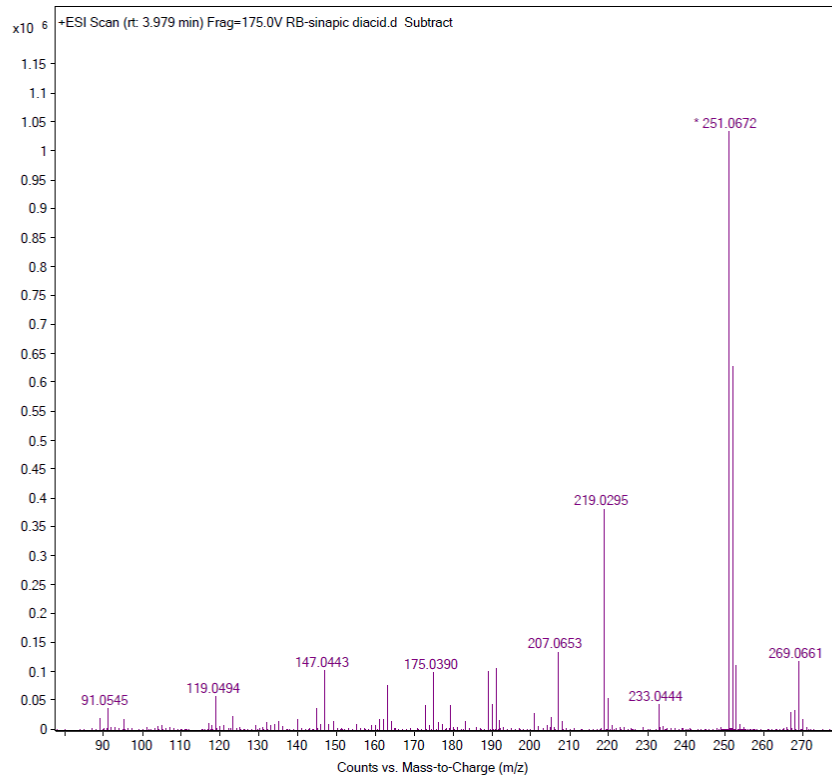

Figure S17: HRMS spectrum of sinapic diacid

|                    |                                          |                               |         |                        |                                  |
|--------------------|------------------------------------------|-------------------------------|---------|------------------------|----------------------------------|
| <b>Sample Name</b> | RB-caffeic diacid                        | <b>Position</b>               | P1-E4   | <b>Instrument Name</b> | QTOF                             |
| <b>User Name</b>   |                                          | <b>Inj Vol</b>                | 1       | <b>InjPosition</b>     |                                  |
| <b>Sample Type</b> | Sample                                   | <b>IRM Calibration Status</b> | Success | <b>Data Filename</b>   | RB-caffeic diacid.d              |
| <b>ACQ Method</b>  | ZorbaxC18-2019-12-04-H2Oac-ACN-avec-ref. | <b>Comment</b>                |         | <b>Acquired Time</b>   | 12/5/2019 5:32:21 PM (UTC+01:00) |

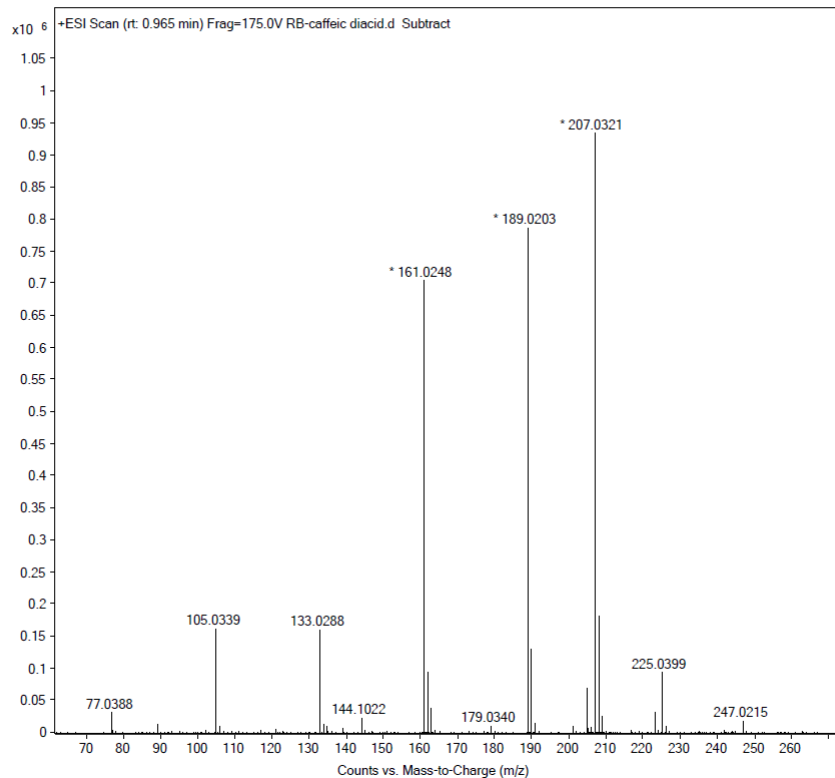

Figure S18: HRMS spectrum of caffeic diacid
